# Supplementary material for: Clinical Potential of DNA Methylation in Gastric Cancer: A Meta-Analysis
Source: PLoS One. 2012 Apr 27;7(4):e36275. doi: 10.1371/journal.pone.0036275 (PMC3338684; doi:10.1371/journal.pone.0036275)
Supplement: Table S1 — List of methylated genes and their component studies for comparing differences between tumour and normal gastric tissue from gastric cancer subjects. Meta-analysis odd ratios (OR) and 95% confidence interval were computed for all methylated genes analysed. Red and bold fonts were used to indicate significant differences between groups. BS-SSCP: bisulfite single-stranded conformation polymorphism; Bseq: bisulfite sequencing; COBRA: combined bisulfite restriction analysis; DPHLC: Denaturing High Performance Liquid Chromatography; FFPE: formalin-fixed paraffin embedded; HRM: high resolution melting; MSP: methylation-specific polymerase chain reaction; PCR: polymerase chain reaction; QMSP: quantitative methylation-specific polymerase chain reaction. (XLS) [file pone.0036275.s003.xls]

## Sheet: GC tumour vs normal tissue
Gene	No. of Studies	First Author	Year	PMID	Methods	Sample type	Meth% (tumour)	n (tumour)	Meth% (normal)	n (normal)	Overall OR (95% CI, Random Effects)
ABCG2	1	Hiraki	2010	19957042	QMSP	fresh frozen	21	49	28	49	0.56 [0.25, 1.25]
ADRA1B	1	Noda	2007	17242706	MSP	fresh frozen	24	34	2	8	7.20 [1.24, 41.94]
ANAPC1	1	Lima	2008	18622497	MSP	fresh frozen	0	46	0	20	Not estimable
APAF1	1	Wang	2007	19135984	MSP	fresh frozen	17	35	6	35	4.56 [1.52, 13.73]
APBA1	3	An	2005	15701853	MSP	FFPE	30	82	4	82	3.70 [1.28, 10.66]
		Etoh	2004	14742272	COBRA	fresh frozen	39	105	23	105
		Zhang	2008	18607505	MSP	fresh frozen	21	47	4	16
APBA2	3	An	2005	15701853	MSP	FFPE	28	83	6	81	8.11 [3.04, 21.63]
		Etoh	2004	14742272	COBRA	fresh frozen	26	105	1	105
		Zhang	2008	18607505	MSP	fresh frozen	19	47	2	16
APC	1	Tsuchiya	2000	10951570	MSP	fresh frozen	33	40	39	40	0.12 [0.01, 1.03]
BCL2	1	Kang	2007	18158559	QMSP	FFPE	20	25	3	25	29.33 [6.20, 138.78]
BCL2L10	1	Mikata	2010	20428828	MSP	fresh frozen	8	21	5	21	1.97 [0.52, 7.49]
BDNF	1	Kang	2007	18158559	QMSP	FFPE	10	25	0	25	34.55 [1.89, 631.93]
BMP3	1	Chen	2010	20238409	MSP	not specified (tissue)	45	50	43	50	1.47 [0.43, 4.97]
BNIP3	1	Murai	2005	15709167	COBRA	not specified (tissue)	36	73	0	73	143.08 [8.54, 2396.38]
BTG4	1	Dong	2009	19399616	MSP	FFPE	28	38	0	15	84.14 [4.61, 1534.87]
BX161496	1	Zheng	2011	21945024	MSP	not specified (tissue)	25	32	22	32	1.62 [0.53, 4.99]
CACNA1G	1	Kang	2007	18158559	QMSP	FFPE	12	25	1	25	22.15 [2.58, 189.95]
CACNA2D1	1	Wanajo	2008	18588891	MSP	FFPE	10	80	1	57	8.00 [0.99, 64.39]
CACNA2D3	1	Wanajo	2008	18588891	MSP	FFPE	24	80	3	57	7.71 [2.19, 27.12]
CADM1	1	Honda	2002	12716461	BS-SSCP	fresh frozen	15	97	0	97	36.64 [2.16, 621.68]
CDH1	7	Borges Bdo	2010	20651373	Bseq	not specified (tissue)	33	12	9	30	2.46 [0.85, 7.15]
		Graziano	2004	14998854	MSP	FFPE	20	70	5	70
		Hiraki	2010	19957042	QMSP	fresh frozen	21	49	27	49
		Leung	2001	11413518	MSP	fresh frozen	21	26	3	26
		Oue	2006	16475210	MSP	fresh frozen	41	75	4	25
		Waki	2002	12163364	MSP	fresh frozen	44	94	63	94
		Zhang	2008	18607505	MSP	fresh frozen	23	47	4	16
CDH13	1	Mori	1999	10408866	MSP	fresh frozen	10	10	2	2	Not estimable
CDH4	1	Miotto	2004	15548679	MSP	not specified (tissue)	20	21	17	21	4.71 [0.48, 46.22]
CDH5	1	Wang	2009	19840376	MSP	not specified (tissue)	11	15	0	15	79.22 [3.87, 1622.84]
CDKN1A	1	Do Nascimento Borges	2010	20668328	Bseq	not specified (tissue)	0	20	0	20	Not estimable
CDKN1B	1	Do Nascimento Borges	2010	20668328	Bseq	not specified (tissue)	0	20	0	20	Not estimable
CDKN1C	1	Kang	2007	18158559	QMSP	FFPE	9	25	24	25	0.02 [0.00, 0.20]
CDKN2A	2	Kang	2007	18158559	QMSP	FFPE	9	25	5	25	4.50 [0.56, 36.04]
		Lima	2008	18622497	MSP	fresh frozen	14	46	0	20
CHFR	10	Cheng	2010	20109344	MSP	fresh frozen	33	64	12	64	8.66 [4.51, 16.64]
		Hiraki	2010	19957042	QMSP	fresh frozen	31	49	15	49
		Honda	2004	15138487	MSP	fresh frozen	25	71	4	71
		Hu	2010	21302620	MSP	fresh frozen	34	70	16	70
		Kang	2004	18158559	Bisulfite-PCR	not specified (tissue)	19	43	0	14
		Kang	2007	18158559	QMSP	FFPE	12	25	0	25
		Koga	2006	16568372	MSP	not specified (tissue)	24	46	2	46
		Satoh	2003	14695171	Bisulfite-PCR	not specified (tissue)	24	61	0	44
		Yoshida	2006	16475678	COBRA	fresh frozen	15	41	0	41
		Gao	2008	18763281	MSP	fresh frozen	9	20	0	20
CMTM3	1	Wang	2009	15188513	MSP	not specified (tissue)	28	63	5	35	4.80 [1.65, 13.98]
CST6	1	Chen	2010	20004178	MSP	FFPE	33	60	5	60	13.44 [4.72, 38.32]
CXCL12	1	Zhi	2011	21960286	MSP	not specified (tissue)	23	35	4	35	14.85 [4.24, 52.03]
CYP1B1	1	Kang	2007	18158559	QMSP	FFPE	10	25	0	25	34.55 [1.89, 631.93]
CYP26B1	1	Zheng	2011	21945024	MSP	not specified (tissue)	31	32	31	32	1.00 [0.06, 16.71]
DAB2IP	1	Dote	2005	15770214	MSP	not specified (tissue)	13	35	2	35	9.75 [2.00, 47.50]
DAPK	4	Ye	2011	21979297	MSP	not specified (tissue)	34	62	11	62	1.37 [0.21, 9.04]
		Hu	2010	21302620	MSP	fresh frozen	42	70	10	70
		Kim	2003	18635522	MSP	fresh frozen	13	39	26	39
		Waki	2003	12824905	MSP	fresh frozen	40	93	68	93
DCC	1	Sato	2001	11461076	MSP	fresh frozen	45	60	43	60	1.19 [0.53, 2.67]
DKK3	1	Yu	2009	20353276	MSP	fresh frozen	117	173	36	104	3.95 [2.36, 6.60]
DLC1	1	Kim	2003	12813468	MSP	fresh frozen	29	97	0	97	83.98 [5.04, 1397.98]
DLEC1	1	Kang	2007	18158559	QMSP	FFPE	13	25	0	25	55.08 [3.02, 1003.70]
EBF3	1	Kim	2011	21387304	MSP	not specified (tissue)	104	42	0	4	6.12 [0.32, 116.65]
FAM84A	1	Zheng	2011	21945024	MSP	not specified (tissue)	24	32	25	32	0.84 [0.26, 2.68]
FLNC	1	Oue	2006	16475210	MSP	fresh frozen	31	75	2	25	8.10 [1.78, 36.91]
GRIK2	1	Wu	2009	19824040	QMSP	not specified (tissue)	18	27	2	27	25.00 [4.81, 129.86]
GRIN2B	2	Kang	2007	18158559	QMSP	FFPE	14	25	24	25	0.40 [0.01, 19.01]
		Liu	2007	17620329	QMSP	fresh frozen	17	28	11	28
GSTP1	1	Leung	2001	11413518	MSP	fresh frozen	7	26	2	26	4.42 [0.82, 23.79]
HAND1	1	Oue	2006	16475210	MSP	fresh frozen	28	75	0	25	30.60 [1.79, 522.23]
HIC1	1	Kanai	1998	9464502	Southern blot	methanol-fixed and paraffin-embedded	19	42	4	27	4.75 [1.40, 16.14]
HLA-A	1	Ye	2010	19883394	MSP	fresh frozen	28	47	9	47	6.22 [2.45, 15.79]
HLA-B	1	Ye	2010	19883394	MSP	fresh frozen	26	47	6	47	8.46 [3.01, 23.74]
HLA-C	1	Ye	2010	19883394	MSP	fresh frozen	23	47	3	47	14.06 [3.82, 51.67]
HLTF	3	Hamai	2003	12901794	MSP	fresh frozen	25	50	1	15	7.34 [2.75, 19.58]
		Leung	2003	12766908	MSP	fresh frozen	10	46	1	10
		Oue	2006	16475210	MSP	fresh frozen	40	75	3	25
HOPX	1	Ooki	2010	20228841	QMSP	FFPE	67	80	8	80	46.38 [18.09, 118.92]
HOXA1	1	Kang	2007	18158559	QMSP	FFPE	12	25	18	25	0.36 [0.11, 1.16]
HOXA10	1	Kang	2007	18158559	QMSP	FFPE	6	25	0	25	17.00 [0.90, 320.37]
HRASLS	1	Oue	2006	16475210	MSP	fresh frozen	30	75	0	25	34.19 [2.01, 582.90]
HRK	1	Obata	2003	14695142	Bisulfite-PCR	not specified (tissue)	4	23	0	23	10.85 [0.55, 214.13]
IGF2	1	Kang	2007	18158559	QMSP	FFPE	14	25	24	25	0.05 [0.01, 0.46]
IGFBP3	1	Gigek	2010	20219400	MSP	not specified (tissue)	90	94	42	43	0.54 [0.06, 4.94]
IQGAP2	1	Jin	2008	17957782	MSP	not specfied (tissue)	28	59	0	12	22.62 [1.28, 399.63]
ITGA4	2	Kang	2007	18158559	QMSP	FFPE	24	25	6	25	25.50 [6.10, 106.61]
		Park	2004	14990990	MSP	fresh frozen	39	46	12	46
KCNA4	1	Zheng	2011	21945024	MSP	not specified (tissue)	30	32	29	32	1.55 [0.24, 9.97]
KL	1	Kang	2007	18158559	QMSP	FFPE	17	25	23	25	0.18 [0.03, 0.98]
KLF4	1	Wei	2005	15805274	MSP	FFPE	4	5	0	5	33.00 [1.06, 1023.56]
LMX1A	1	Dong	2011	21159062	COBRA	fresh frozen	41	50	13	50	12.97 [4.97, 33.83]
LOX	1	Oue	2006	16475210	MSP	fresh frozen	31	75	3	25	5.17 [1.42, 18.79]
LRP1B	1	Lu	2010	20095042	QMSP	not specified (tissue)	45	74	17	74	5.20 [2.55, 10.64]
MGMT	3	Bae	2002	12085181	MSP	Methanol-fixed tissue	21	149	0	149	5.18 [1.22, 21.98]
		Hiraki	2010	19957042	QMSP	fresh frozen	26	49	15	49
		Oue	2006	16475210	MSP	fresh frozen	20	75	2	25
MINT12	1	Etoh	2004	14742272	COBRA	fresh frozen	18	104	6	104	3.42 [1.30, 9.00]
MINT25	1	An	2005	15701853	MSP	FFPE	46	83	0	82	204.60 [12.28, 3409.55]
MINT31	3	An	2005	15701853	MSP	FFPE	31	83	15	81	2.76 [1.04, 7.33]
		Etoh	2004	14742272	COBRA	fresh frozen	10	105	0	105
		Zhang	2008	18607505	MSP	fresh frozen	12	47	3	16
MLH1	15	An	2005	15701853	MSP	FFPE	14	83	0	82	3.16 [1.80, 5.56]
		Bevilacqua	2000	10861474	HpaII PCR	fresh frozen	8	42	0	42
		Deng	2002	11809901	DPHLC	fresh frozen	0	13	0	13
		Endoh	2000	10980110	MSP	FFPE	26	41	12	17
		Etoh	2004	14742272	MSP	fresh frozen	18	105	15	105
		Hiraki	2010	19957042	QMSP	fresh frozen	32	49	21	49
		Leung	2001	11413518	MSP	fresh frozen	9	26	0	26
		Mikita	2010	20428828	MSP	fresh frozen	2	21	1	21
		Moura	2008	19181186	MSP	not specified (tissue)	10	46	0	20
		Oue	2006	16475210	MSP	fresh frozen	8	75	0	25
		Sakata	2002	11870538	MSP	FFPE	21	30	19	52
		Shibata	2002	12384516	QMSP	fresh frozen	8	32	1	32
		Shibata	2006	16557577	QMSP	fresh frozen	10	48	0	48
		Waki	2002	12163364	MSP	fresh frozen	30	94	23	94
		Zhang	2008	18607505	MSP	fresh frozen	25	47	4	16
MSH2	1	Moura	2008	19181186	MSP	not specified (tissue)	8	46	0	20	9.05 [0.50, 164.85]
MSH6	1	Moura	2008	19181186	MSP	not specified (tissue)	1	46	0	20	1.35 [0.05, 34.61]
MT1G	1	Kang	2007	18158559	QMSP	FFPE	8	25	22	25	0.06 [0.01, 0.28]
NR3C1	1	Kang	2007	18158559	QMSP	FFPE	6	25	0	25	17.00 [0.90, 320.37]
p15	1	Leung	2001	11413518	MSP	fresh frozen	19	26	5	26	11.40 [3.09, 42.03]
p16	13	An	2005	15701853	MSP	FFPE	16	81	2	80	3.10 [1.22, 7.85]
		Ding	2003	12632489	HpaII PCR	fresh frozen	14	20	0	20
		Etoh	2004	14742272	MSP	fresh frozen	23	103	18	104
		Hiraki	2010	19957042	QMSP	fresh frozen	16	49	33	49
		Hu	2010	21302620	MSP	fresh frozen	48	70	9	70
		Jang	2001	11477571	MSP	fresh frozen	20	46	27	46
		Kanyama	2003	12824886	MSP	fresh frozen	23	60	0	60
		Leung	2001	11413518	MSP	fresh frozen	17	26	5	26
		Mikata	2010	20428828	MSP	fresh frozen	9	21	5	21
		Mino	2006	16465421	MSP	FFPE	3	13	1	13
		Oue	2006	16475210	MSP	fresh frozen	16	75	3	25
		Waki	2002	12163364	MSP	fresh frozen	21	94	41	94
		Zhang	2008	18607505	MSP	fresh frozen	30	47	3	16
PCDH10	1	Yu	2010	19051296	HRM	not specified (tissue)	47	100	3	100	28.67 [8.51, 96.56]
PDX1	1	Ma	2010	20622005	MSP	not specified (tissue)	30	30	14	30	69.41 [3.89, 1239.18]
PMS2	1	Moura	2008	19181186	MSP	not specified (tissue)	13	46	0	20	16.52 [0.93, 293.07]
PRDM2	3	Oshimo	2004	15069684	MSP	fresh frozen	31	45	3	14	5.19 [2.25, 11.94]
		Oue	2006	16475210	MSP	fresh frozen	50	75	5	25
		Tokumaru	2003	14534544	QMSP	not specified (tissue)	11	30	6	30
PRDM5	1	Watanabe	2007	17699856	COBRA	not specified (tissue)	39	78	0	44	89.00 [5.29, 1496.15]
PTCH1a	1	Du	2009	19673023	MSP	fresh frozen	55	170	0	170	163.86 [10.02, 2679.17]
RAB32	1	Shibata	2006	16557577	QMSP	fresh frozen	13	48	0	48	36.89 [2.12, 641.33]
RARB	1	Oue	2006	16475210	MSP	fresh frozen	38	75	4	25	5.39 [1.69, 17.22]
RARRES1	1	Kang	2007	18158559	QMSP	FFPE	9	25	21	25	0.11 [0.03, 0.41]
RASSF1A	1	Ye	2007	17608924	MSP	fresh frozen	36	54	8	54	11.50 [4.49, 29.44]
RBP1	1	Kang	2007	18158559	QMSP	FFPE	16	25	20	25	0.44 [0.12, 1.59]
RECK	1	Du	2010	20143471	MSP	fresh frozen	19	40	11	40	2.39 [0.94, 6.05]
RELN	1	Dohi	2010	19956836	COBRA	fresh frozen	15	15	12	15	8.68 [0.41, 184.28]
RNF180	1	Cheung	2011	21717426	COBRA	not specified (tissue)	150	198	0	23	145.85 [8.70, 2446.27]
RUNX3	9	Chen	2010	19006069	MSP	fresh frozen	28	70	2	70	4.31 [2.14, 8.70]
		Hiraki	2010	19957042	QMSP	fresh frozen	28	49	14	49
		Hu	2010	21302620	MSP	fresh frozen	42	70	19	70
		Kang	2007	18158559	QMSP	FFPE	14	25	2	25
		Kitajima	2008	18097595	MSP	fresh frozen	30	57	10	57
		Mikata	2010	20428828	MSP	fresh frozen	10	21	4	21
		Oshimo	2004	15051926	MSP	fresh frozen	57	80	38	45
		So	2006	16984612	MSP	fresh frozen	11	26	6	26
		Waki	2003	12824905	MSP	fresh frozen	42	93	7	93
SCGB3A1	2	Kang	2007	18158559	QMSP	FFPE	16	25	6	25	2.84 [0.88, 9.15]
		Gong	2011	21274384	MSP	fresh frozen	26	45	17	38
SDHB	1	Cao	2010	20618733	MSP	FFPE	0	100	0	100	Not estimable
SEZ6L	1	Kang	2007	18158559	QMSP	FFPE	22	25	23	25	0.64 [0.10, 4.19]
SFRP1	3	Kinoshita	2011	21830441	?	not specified (tissue)	35	35	35	35	3.43 [1.55, 7.61]
		Cheng	2007	17848950	MSP	fresh frozen	27	30	25	30
		Zhao	2007	17465504	MSP	fresh frozen	23	52	8	52
SFRP2	2	Kinoshita	2011	21830441	?	not specified (tissue)	29	35	24	35	4.87 [1.01, 23.40]
		Cheng	2007	17848950	MSP	fresh frozen	22	30	6	30
SFRP4	2	Cheng	2007	17848950	MSP	fresh frozen	9	30	6	30	1.35 [0.46, 3.93]
		Kang	2007	18158559	QMSP	FFPE	23	25	24	25
SFRP5	3	Kinoshita	2011	21830441	?	not specified (tissue)	15	35	19	35	0.50 [0.27, 0.91]
		Cheng	2007	17848950	MSP	fresh frozen	9	30	15	30
		Kang	2007	18158559	QMSP	FFPE	14	25	19	25
SMAD9	1	Kang	2007	18158559	QMSP	FFPE	9	25	3	25	4.13 [0.96, 17.70]
SMARCA5	1	Gigek	2011	21261476	MSP	FFPE	20	92	6	48	1.94 [0.72, 5.23]
SOCS1	1	Oshimo	2004	15386345	MSP	fresh frozen	33	75	3	25	5.76 [1.59, 20.92]
SPINT2	1	Dong	2010	19576178	MSP	not specified (tissue)	30	40	0	19	113.29 [6.27, 2045.31]
SULF1	1	Chen	2009	20492341	MSP	fresh frozen	9	16	3	11	3.43 [0.66, 17.93]
SYK	1	Wang	2004	17876870	MSP	fresh frozen	21	61	0	61	65.30 [3.85, 1108.43]
TAC1	1	David	2009	19046942	QMSP	fresh frozen	21	47	6	41	4.71 [1.67, 13.32]
TBPL1	1	Dong	2010	20063316	MSP	not specified (tissue)	6	30	18	30	0.17 [0.05, 0.53]
TCF4	1	Kim	2008	14612952	MSP	fresh frozen	18	20	4	20	36.00 [5.80, 223.54]
TERT	2	Gigek	2009	20001710	MSP	not specified (tissue)	45	109	6	53	13.41 [1.57, 114.69]
		Kang	2007	18158559	QMSP	FFPE	17	25	1	25
TFPI2	1	Takada	2010	20113832	COBRA	fresh frozen	15	18	4	18	17.50 [3.31, 92.47]
THBD	1	Oue	2006	16475210	MSP	fresh frozen	29	75	3	25	4.62 [1.27, 16.84]
THBS1	1	Etoh	2004	14742272	COBRA	fresh frozen	25	104	2	105	16.30 [3.75, 70.87]
TIMP3	1	Gu	2008	18516293	QMSP	fresh frozen	9	15	2	14	9.00 [1.46, 55.48]
TMEFF2	2	Ivanauskas	2008	18799374	QMSP	fresh frozen	35	48	27	48	6.35 [0.48, 83.66]
		Shibata	2002	12384516	QMSP	fresh frozen	15	32	1	32
TP53	1	Lima	2008	18622497	MSP	fresh frozen	0	46	0	20	Not estimable
TP73	1	Kang	2007	18158559	QMSP	FFPE	6	25	0	25	17.00 [0.90, 320.37]
TSPYL5	1	Jung	2008	18059362	MSP	fresh frozen	23	36	5	36	10.97 [3.43, 35.13]
TWIST1	1	Kang	2007	15201973	QMSP	FFPE	22	25	18	25	2.85 [0.64, 12.64]
UCHL1	1	Yamashita	2006	16585221	Bseq	fresh frozen	15	31	3	31	8.75 [2.19, 34.90]
VHL	2	Cao	2008	18607865	MSP	methacarn-fixed tissue	0	6	0	6	Not estimable
		Leung	2001	11413518	MSP	fresh frozen	0	26	0	26
WT1	1	Zheng	2011	21945024	MSP	not specified (tissue)	28	32	25	32	1.96 [0.51, 7.50]
XRCC1	1	Wang	2010	21091896	MSP	fresh frozen	26	34	7	34	12.54 [3.98, 39.53]
ZIC1	1	Wang	2009	19509237	MSP	fresh frozen	35	37	0	37	1065.00 [49.40, 22961.75]
